# Supplementary material for: Tunability of the electronic properties and electrical contact in graphene/SiH heterostructures
Source: Royal Society of Chemistry journal article supplement (doi:10.1039/d2cp03350j), 2022-01-01
Supplement: d2cp03350j1.pdf [file d2cp03350j1.pdf]

Supporting Information (SI)

**Tunability of the electronic properties and electrical contact  
in Graphene/SiH heterostructure**

Son-Tung Nguyen<sup>1</sup>, Pham V. Cuong<sup>1</sup>, Cuong Q. Nguyen<sup>2,3,†</sup> and Chuong V. Nguyen<sup>4,†</sup>

<sup>1</sup>*Faculty of Electrical Engineering, Hanoi University of Industry, Hanoi 100000, Vietnam*

<sup>2</sup>*Institute of Research and Development, Duy Tan University, Da Nang 550000, Vietnam.*

<sup>3</sup>*Faculty of Natural Sciences, Duy Tan University, Da Nang 550000, Vietnam*

<sup>4</sup>*Department of Materials Science and Engineering,  
Le Quy Don Technical University, Ha Noi 100000, Vietnam*

†*Corresponding authors: [chuong.vnguyen@lqdtu.edu.vn](mailto:chuong.vnguyen@lqdtu.edu.vn) and  
[nguyenquangcuong3@duytan.edu.vn](mailto:nguyenquangcuong3@duytan.edu.vn)*

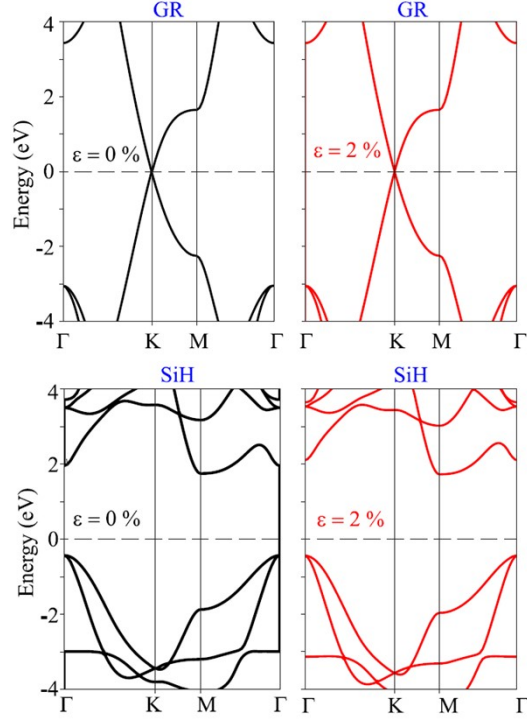

Fig. S1. Calculated band structures of GR and SiH monolayers under small biaxial strain of 2 %.

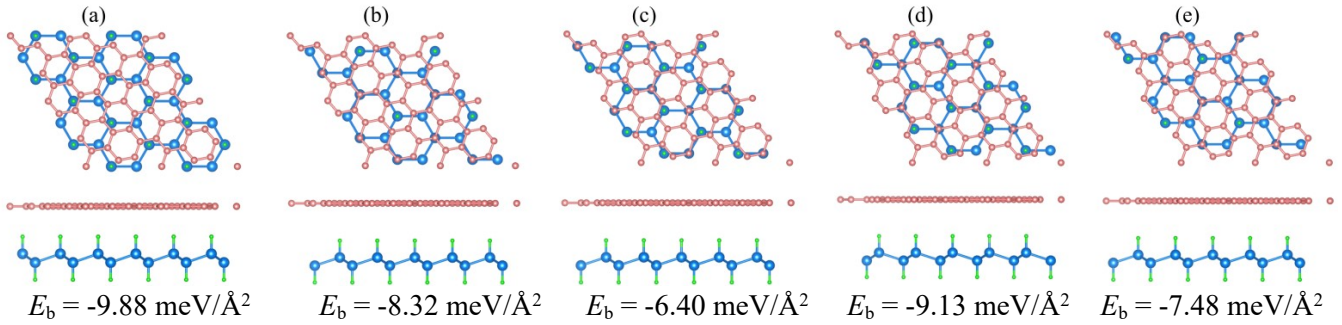

Fig. S2. Different stacking configurations and calculated binding energy of GR/SiH heterostructures for (a) stacking I, (b) stacking II, (c) stacking III and (d) stacking IV and (e) stacking V.

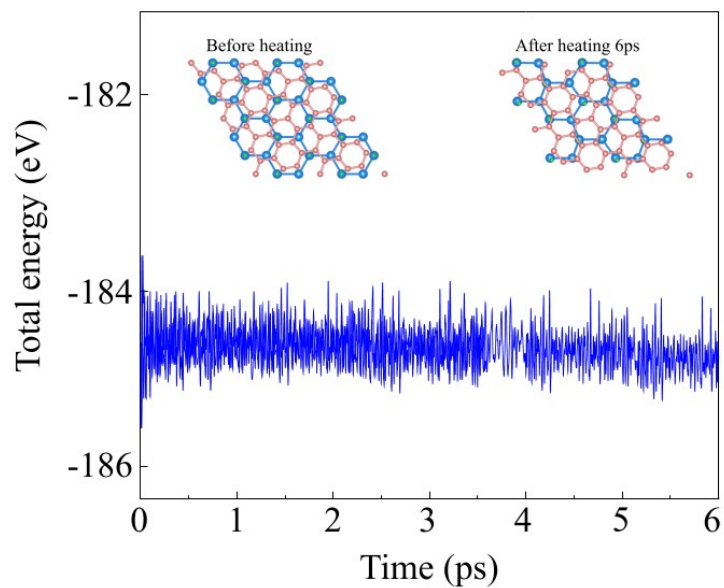

Fig. S3. The fluctuation of total energy as a function of time steps by performing ab initio molecular dynamics (AIMD) simulation at 300 K. The snapshots represent the atomic structures of Gr/SiH for the most stable stacking configuration before and after heating 6 ps.
